# Supplementary material for: Microscopic menace: exploring the link between microplastics and cancer pathogenesis
Source: Royal Society of Chemistry journal article supplement (doi:10.1039/d5em00232j), 2025-01-01
Supplement: d5em00232j1.pdf [file d5em00232j1.pdf]

## **Microscopic Menace: Exploring the Link Between Microplastics and Cancer Pathogenesis**

*Manu M. Joseph <sup>[1]\*</sup>, Jyothi B. Nair <sup>[2]</sup>, Anu Mary Joseph <sup>[3]</sup>*

[1] Department of Life Sciences, CHRIST University, Bengaluru - 560029, Karnataka, India.

[2] Leibniz Institute of Photonic Technology, Albert-Einstein-Straße 9, Jena 07745, Germany

[3] Department of Chemistry, Newman College, Thodupuzha 685585, Kerala, India.

### **Corresponding Author**

Dr. Manu M. Joseph  
Assistant Professor  
Department of Life Sciences  
CHRIST University  
Bengaluru – 560029  
Karnataka, India.

Email: manu.joseph@christuniversity.in/ manumjoseph2000@gmail.com

Orcid ID: 0000-0003-3647-7620

**Table S1:** Characteristics of microplastics: The following table summarizes the main categories of microplastic sources and their characteristics. [19-31]

| Source Category        | Examples                              | Type              | Primary Environmental Compartment |
|------------------------|---------------------------------------|-------------------|-----------------------------------|
| Personal care products | Microbeads in cosmetics, toothpaste   | Primary           | Aquatic (via wastewater)          |
| Textiles               | Synthetic fibers from clothing        | Primary           | Aquatic, Atmospheric              |
| Industrial production  | Pre-production pellets                | Primary           | Terrestrial, Aquatic              |
| Single-use Plastics    | Bags, bottles, packaging              | Secondary         | Terrestrial, Aquatic              |
| Automotive             | Tire wear particles                   | Secondary         | Terrestrial, Aquatic, Atmospheric |
| Construction           | Paint fragments, insulation materials | Secondary         | Terrestrial, Atmospheric          |
| Agriculture            | Mulch films, irrigation systems       | Secondary         | Terrestrial                       |
| Urban environments     | Artificial turf, road markings        | Secondary         | Terrestrial, Aquatic              |
| Marine activities      | Fishing gear, aquaculture equipment   | Secondary         | Aquatic                           |
| Atmospheric deposition | Airborne particles                    | Primary/Secondary | Ubiquitous                        |

**Table S2:** Sources of microplastics. [19-31]

| Source                         | Description                                     | Type      | Size Range (mm) | Typical Uses                                |
|--------------------------------|-------------------------------------------------|-----------|-----------------|---------------------------------------------|
| Microbeads                     | Small plastic spheres in personal care products | Primary   | 0.1 - 5         | Exfoliating scrubs, toothpaste, shower gels |
| Industrial pellets             | Raw materials for plastic manufacturing         | Primary   | 1 - 5           | Production of plastic items                 |
| Synthetic fibers               | Fibers from synthetic textiles                  | Primary   | < 1             | Clothing, carpets, upholstery               |
| Degradation of larger plastics | Fragmentation of larger plastic debris          | Secondary | < 5             | Plastic bottles, bags, containers           |
| Rubber abrasion                | Wear and tear of rubber products                | Secondary | < 5             | Tires, rubber mats                          |
| Paints and coatings            | Breakdown of paints and coatings                | Secondary | < 5             | Marine vessels, infrastructure              |

**Table S3:** Physical and chemical properties of microplastics

| Property            | Description                                      | Polymers Type                                                         |
|---------------------|--------------------------------------------------|-----------------------------------------------------------------------|
| Size                | 1 $\mu\text{m}$ to 5 mm                          | Microbeads (1 $\mu\text{m}$ ), Fragments (5 mm)                       |
| Shape               | Fragments, fibers, films, foams, pellets         | Fibers (from textiles), Pellets (nurdles)                             |
| Density             | Affects buoyancy in water                        | PE (0.91-0.97 g/cm <sup>3</sup> ), PET (1.38-1.41 g/cm <sup>3</sup> ) |
| Surface Area        | High surface-area-to-volume ratio                | Increases adsorption of pollutants                                    |
| Surface Roughness   | Pits and cracks enhance pollutant adsorption     | Weathered plastic debris                                              |
| Polymer Composition | Determines chemical stability and persistence    | PE, PP, PVC, PET, PS                                                  |
| Additives           | Chemical compounds added to enhance performance  | Phthalates, BPA, BFRs                                                 |
| Adsorption Capacity | Ability to adsorb hydrophobic organic pollutants | PCBs, PAHs, heavy metals                                              |

**Table S4:** Properties of different types of microplastics: Key physical and chemical properties of common microplastic types found in the environment

| Polymer Type                     | Density (g/cm <sup>3</sup> ) | Common Shapes     | Typical Size Range | Primary Applications  | Key Chemical Characteristics                        |
|----------------------------------|------------------------------|-------------------|--------------------|-----------------------|-----------------------------------------------------|
| Polyethylene (PE)                | 0.91-0.97                    | Fragments, Films  | 10 µm - 5 mm       | Packaging, Bottles    | Highly resistant to chemicals, Low water absorption |
| Polypropylene (PP)               | 0.89-0.91                    | Fibers, Fragments | 20 µm - 5 mm       | Textiles, Ropes       | Good chemical resistance, Low moisture absorption   |
| Polystyrene (PS)                 | 1.04-1.09                    | Spheres, Foams    | 10 µm - 5 mm       | Packaging, Insulation | Brittle, Susceptible to UV degradation              |
| Polyvinyl Chloride (PVC)         | 1.16-1.58                    | Fragments, Films  | 50 µm - 5 mm       | Construction, Pipes   | High chlorine content, Requires stabilizers         |
| Polyethylene Terephthalate (PET) | 1.37-1.45                    | Fibers, Fragments | 10 µm - 5 mm       | Textiles, Bottles     | High strength, Good chemical resistance             |

**Table S5:** Role of microplastics in generating ROS, focusing on their characteristics, mechanisms, biological effects, and outcomes.

| Aspect                       | Description                                                                                                                                                                                                                              |
|------------------------------|------------------------------------------------------------------------------------------------------------------------------------------------------------------------------------------------------------------------------------------|
| Microplastic characteristics | <ul style="list-style-type: none"> <li>- Increased surface area-to-volume ratio.</li> <li>- Contain chemical additives</li> <li>- Adsorb pollutants</li> </ul>                                                                           |
| ROS generation mechanisms    | <ul style="list-style-type: none"> <li>- Surface interaction</li> <li>- Chemical leaching</li> <li>- Pollutant release</li> </ul>                                                                                                        |
| Cellular pathways activated  | <ul style="list-style-type: none"> <li>- NADPH oxidase activation</li> <li>- Mitochondrial dysfunction due to oxidative damage</li> <li>- Pro-inflammatory cytokine release</li> </ul>                                                   |
| Biological effects           | <ul style="list-style-type: none"> <li>- Oxidative stress</li> <li>- Lipid peroxidation</li> <li>- Protein and DNA damage</li> </ul>                                                                                                     |
| Toxicological outcomes       | <ul style="list-style-type: none"> <li>- Inflammation:</li> <li>- Cellular dysfunction</li> <li>- Disease susceptibility</li> </ul>                                                                                                      |
| ROS detection markers        | <ul style="list-style-type: none"> <li>- Malondialdehyde (MDA): Marker for lipid peroxidation</li> <li>- Protein carbonylation: Indicator of oxidative protein damage</li> <li>- Increased ROS levels detected through assays</li> </ul> |
| ROS amplification            | <ul style="list-style-type: none"> <li>- Lipid peroxidation feedback loop</li> <li>- Synergistic effects with co-pollutants and chemicals</li> </ul>                                                                                     |

**Table S6:** Role of microplastics in generating inflammation.

| Aspect                       | Description                                                                         |
|------------------------------|-------------------------------------------------------------------------------------|
| Microplastic exposure routes | <ul style="list-style-type: none"> <li>- Ingestion</li> <li>- Inhalation</li> </ul> |

| Aspect                          | Description                                                                                                         |
|---------------------------------|---------------------------------------------------------------------------------------------------------------------|
|                                 | - Dermal contact                                                                                                    |
| Key immune cells involved       | - Macrophages<br>- Neutrophils<br>- Dendritic Cells                                                                 |
| Mechanisms of inflammation      | Physical interaction<br>Pattern recognition receptor activation<br>Lysosomal stress                                 |
| Key inflammatory pathways       | - Toll-like receptors (TLRs)<br>- NLRP3 inflammasome                                                                |
| Pro-inflammatory cytokines      | - Tumor Necrosis Factor-alpha (TNF- $\alpha$ )<br>- Interleukin-1 $\beta$ (IL-1 $\beta$ )<br>- Interleukin-6 (IL-6) |
| Inflammatory mediators released | - Chemokines<br>- ROS                                                                                               |
| Tissue effects                  | - Mechanical damage<br>- Lysosomal damage                                                                           |
| Chronic inflammation outcomes   | - Lung Inflammation.<br>- Gut Inflammation<br>- Systemic Inflammation                                               |

**Table S7:** Carcinogenic properties of microplastics and the associated chemicals.

| Component                               | Source/Type                                                 | Carcinogenic mechanism                                                            | Health effects                                             | Key findings                                                                                                           |
|-----------------------------------------|-------------------------------------------------------------|-----------------------------------------------------------------------------------|------------------------------------------------------------|------------------------------------------------------------------------------------------------------------------------|
| Microplastics                           | Degraded plastics                                           | Physical damage, oxidative stress, and chronic inflammation                       | Potential risk of cancers                                  | Animal studies reveal microplastic accumulation in organs, inducing inflammation and oxidative stress.                 |
| Polycyclic Aromatic Hydrocarbons (PAHs) | Environmental contaminants adsorbed onto microplastics      | DNA adduct formation, oxidative stress, interference with DNA repair mechanisms   | Lung, skin, and bladder cancers                            | Animal models have shown PAH-exposed microplastics lead to increased risk of lung and skin cancers.                    |
| Bisphenol A (BPA)                       | Plastic additive used in polycarbonate plastics             | Endocrine disruption, estrogen receptor binding, abnormal cell proliferation      | Breast, prostate, and ovarian cancers                      | BPA is linked to hormone-related cancers, increasing the risk of breast and prostate cancer.                           |
| Phthalates                              | Plasticizers used in flexible plastics                      | Endocrine disruption, hormone receptor interference, chronic inflammation         | Testicular, breast, liver, and reproductive system cancers | Chronic exposure also promotes liver inflammation and fibrosis.                                                        |
| Heavy metals                            | Adsorbed onto microplastics from the environment            | Direct interaction with DNA, oxidative stress, inhibition of DNA repair           | Lung, liver, kidney, and bone cancers                      | Heavy metals, such as cadmium and lead, are classified as carcinogens.                                                 |
| Persistent Organic Pollutants (POPs)    | Environmental toxins adsorbed on microplastic surfaces      | Hormone disruption, oxidative stress, DNA damage, bioaccumulation in tissues      | Breast, liver, thyroid, and reproductive cancers           | POPs are known carcinogens.                                                                                            |
| Endocrine-Disrupting Chemicals (EDCs)   | Chemicals like BPA, phthalates, and other plastic additives | Disruption of hormonal balance, abnormal growth signaling pathways, tumorigenesis | Hormone-dependent cancers (breast, ovarian, prostate)      | EDCs are known to interfere with the body's hormonal system, leading to a higher incidence of hormone-related cancers. |
| Flame retardants                        | Additives in plastics to prevent fire                       | Endocrine disruption, oxidative stress, potential DNA damage                      | Breast, thyroid, and liver cancers                         | Chemicals interfere with thyroid hormone regulation, contributing to thyroid and liver cancers.                        |
| Nanoplastics                            | Smaller fragments of                                        | Increased cellular uptake, oxidative                                              | Potential for gastrointestinal,                            | Nanoplastics can penetrate deeper into                                                                                 |

| Component            | Source/Type                                           | Carcinogenic mechanism                                                                                          | Health effects                                            | Key findings                                                                                                                                        |
|----------------------|-------------------------------------------------------|-----------------------------------------------------------------------------------------------------------------|-----------------------------------------------------------|-----------------------------------------------------------------------------------------------------------------------------------------------------|
|                      | microplastics (<100 nm)                               | stress, DNA damage, chronic inflammation                                                                        | lung, liver, and kidney cancers                           | tissues and cells, potentially leading to long-term carcinogenic effects.                                                                           |
| Oxidative stress     | ROS generated by microplastic exposure                | ROS damage DNA, lipids, and proteins, resulting in mutations and genomic instability                            | Broad range of cancers depending on site of accumulation  | Microplastics induce ROS, leading to DNA damage and tumor initiation in several organs.                                                             |
| Chronic inflammation | Persistent immune response triggered by microplastics | Inflammatory cytokines promote cell proliferation, inhibit apoptosis, and foster a pro-carcinogenic environment | Various cancers, including colon, lung, and liver cancers | Chronic inflammation, as induced by microplastics, can drive cancer progression, particularly in the gastrointestinal tract and respiratory system. |

**Table S8:** Summary of techniques used to detect microplastics in human tissues:

| Technique                                                                                 | Principle                                                               | Advantages                                                                | Limitations                                                                      | Detection Range                | Applications in microplastic detection                                  |
|-------------------------------------------------------------------------------------------|-------------------------------------------------------------------------|---------------------------------------------------------------------------|----------------------------------------------------------------------------------|--------------------------------|-------------------------------------------------------------------------|
| <b>Fourier Transform Infrared (FTIR) Spectroscopy</b>                                     | Measures vibrational modes of polymers to identify chemical composition | Non-destructive, widely available, high chemical specificity              | Limited spatial resolution, challenging for small particles (<10 $\mu\text{m}$ ) | Micrometres to millimeters     | Identifies specific polymer types in tissues                            |
| <b>Raman Spectroscopy</b>                                                                 | Detects molecular vibrations providing chemical fingerprints            | High spatial resolution, non-destructive, effective for smaller particles | Fluorescence interference, time-consuming for large samples                      | Sub-micrometers to millimeters | Detection of smaller microplastics and nanoplastics in complex matrices |
| <b>Scanning Electron Microscopy (SEM) with Energy Dispersive X-ray Spectroscopy (EDS)</b> | Provides high-resolution imaging and elemental composition              | Detailed morphological data, surface analysis                             | Cannot directly identify polymers, requires sample preparation                   | Micrometers to millimeters     | Imaging and surface characterization of microplastic particles          |
| <b>Pyrolysis Gas Chromatography-Mass</b>                                                  | Thermal degradation of microplastics                                    | High sensitivity, quantitative,                                           | Destructive, no information                                                      | Nanometers to millimeters      | Identifies polymer types and                                            |

|                                                        |                                                                                                  |                                                         |                                                           |                            |                                                                 |
|--------------------------------------------------------|--------------------------------------------------------------------------------------------------|---------------------------------------------------------|-----------------------------------------------------------|----------------------------|-----------------------------------------------------------------|
| <b>Spectrometry (Py-GC-MS)</b>                         | followed by GC-MS analysis of breakdown products                                                 | applicable for complex samples                          | about particle morphology                                 |                            | quantifies microplastics in biological samples                  |
| <b>Nile Red Staining</b>                               | Fluorescent dye binds to hydrophobic particles like microplastics                                | Rapid screening, low-cost                               | Non-specific binding to other hydrophobic materials       | Micrometers to millimeters | Quick screening of microplastics under fluorescence microscopy  |
| <b>Thermogravimetric Analysis (TGA)</b>                | Measures weight loss as a function of temperature to differentiate between organics and polymers | Quantifies plastic content, useful for complex matrices | Destructive, cannot identify specific polymer types       | Bulk analysis              | Estimation of microplastic content based on thermal profiles    |
| <b>Laser Direct Infrared (LDIR) Imaging</b>            | Automated IR imaging that maps microplastics in samples                                          | High-throughput, fast-scanning                          | Limited to surface analysis, costly equipment             | Micrometers to millimeters | Rapid detection and mapping of microplastics in tissue sections |
| <b>Liquid Chromatography-Mass Spectrometry (LC-MS)</b> | Separates and identifies dissolved components by mass                                            | High sensitivity, potential for nanoscale detection     | Requires sample dissolution, early-stage application      | Nanometers to micrometers  | Detection of small microplastics or nanoplastics in tissues     |
| <b>Field Flow Fractionation (FFF)</b>                  | Separates particles based on size in a fluid flow                                                | Highly sensitive, can separate small particles          | Expensive, time-consuming, requires specialized equipment | Nanometers to micrometers  | Separating and detecting nanoplastics in biological samples     |
